# Supplementary material for: Epigenetic Marker of Telomeric Age is Associated with Exacerbations and Hospitalizations in Chronic Obstructive Pulmonary Disease
Source: Research Square preprint supplement (doi:10.21203/rs.3.rs-847329/v1), 2021-09-07
Supplement: Supplementary file 2 [file b6d43e2bf0de97fdec83db8d.docx]

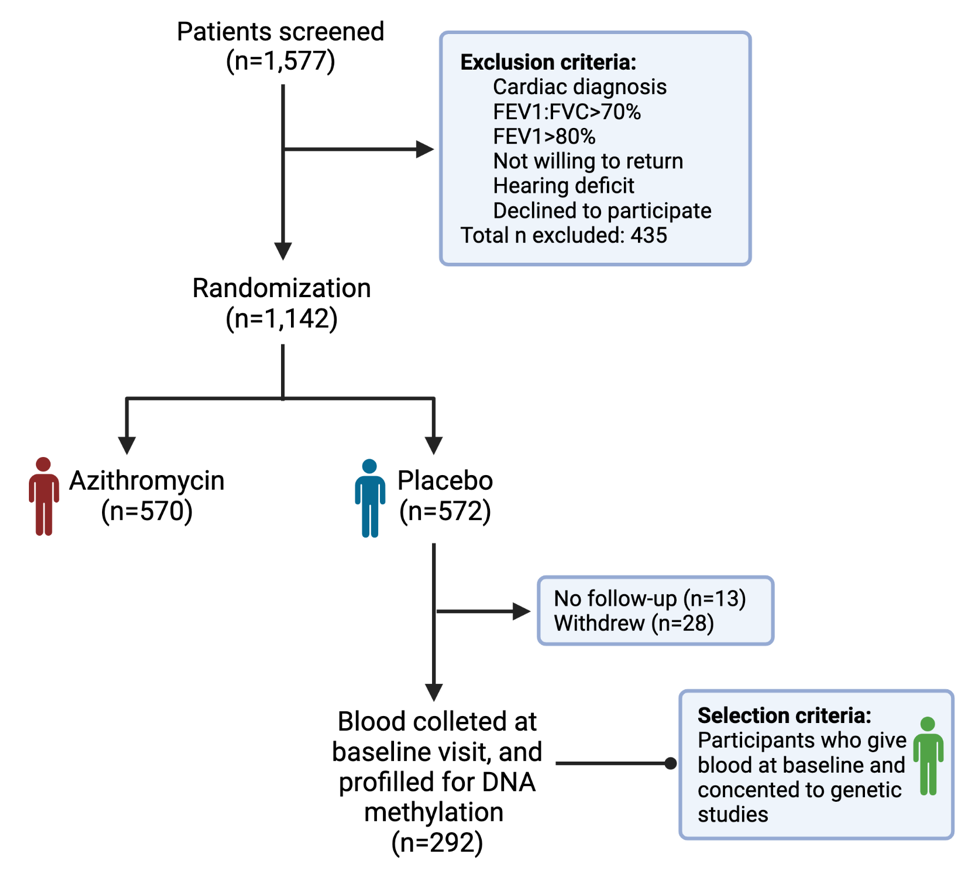


**Figure S1.** Randomization of the Macrolide Azithromycin to Prevent Rapid Worsening of Symptoms Associated With Chronic Obstructive Pulmonary Disease study (MACRO). Created with BioRender.com
